# Supplementary material
Source: PubMed Central journal article supplement (PMC3435190)
Supplement: 1207036109_pnas.201207036SI.pdf [file 1207036109_pnas.201207036SI.pdf]

# Supporting Information

## Sentmanat and Elgin 10.1073/pnas.1207036109

### SI Materials and Methods

**Fly Stocks.** FLP-mediated excision of inserts was performed using *hs-FLP* *Cy/noc* *Sco* (6876) as described previously (1). The *yw*<sup>67c23</sup> strain was used to outcross reporter lines for pigment assays (for <sup>+/−</sup>1360 assays and wt controls for mutant analysis) and ChIP-qPCR. Alleles used for PEV assays are *yw*; *Su(var)205*<sup>02</sup>/*CyO*, *yw*; *Su(var)205*<sup>05</sup>/*CyO*, *w*<sup>118</sup>; *Su(var)3-9*<sup>06</sup>, *w*<sup>118</sup>; *aub*<sup>QC42</sup>/*CyO*, *w*<sup>118</sup>; *aub*<sup>ΔP-3a</sup>/*CyO* (2), *w*<sup>118</sup>; *piwi*<sup>1</sup>/*CyO* (3), *w*<sup>118</sup>; *piwi*<sup>2</sup>/*CyO* (3).

**Constructs.** The *P* element landing pad construct was derived from P[T1] (1). Phage-attachment sites attP1 and attP2 were PCR-amplified (using primers attP1F, attP1R, attP2F, and attP2R) from pUASTP2 (4) and cloned into *Stu*I and *Cl*aI sites of P[T1], respectively. The Clontech In-Fusion PCR Cloning System was used; primers were designed according to specifications of the manufacturer (5).

Donor constructs were derived from pCiB-yin (4) by PCR amplifying *yellow* [primers *y* forward (F), *y* reverse (R)] to clone into the pCR2.1 TOPO vector to make pCR2.1-*y* (4). The attB1 and attB2 sites were cloned from pCiB-GFP (4), and the loxP sites from pP[wlo+GS]. The attB2 site was inserted into *Apa*I of pCR2.1-*y* to generate pCR2.1-*y*-attB2. A loxP site was cloned into a new pCR2.1 TOPO vector, and attB1 was inserted upstream at *Kpn*I to make pCR2.1-attB1-loxP. PCR amplification of attB1-loxP and insertion into the *Sac*I site of pCR2.1-*y*-attB2 was carried out to produce pCR2.1-attB1-loxP-*y*-attB2. A second loxP site from pP[wlo+GS] and a *frt* site from P[T1] were cloned into a new pCR2.1 TOPO vector to make pCR2.1-loxP-*frt*. Each deletion construct (Fig. 3A) was derived from the 1360{1503} copy present in P[T1]. The full-length *Invader4* construct (Fig. 4A) was derived from *Invader4*{1541} (subcloned from the fourth chromosome into pCR2.1 TOPO-TA vector using primers *Invader4F/R*) and cloned into the *Xho*I site of pCR2.1-loxP-*frt* using primers *XhoIIInvader4F/R*. The list of primers used to amplify deletion constructs can be found in Table S1. Each amplified deletion construct was cloned into the *Xho*I site of pCR2.1-loxP-*frt* to generate pCR2.1-loxP-*frt*-1360Δ. Primers *XhoI8-24F* and *XhoI8-24R* were used to amplify loxP-*frt*-1360Δ to clone into the *Xho*I site of pCR2.1-attB-loxP-*y*-attB to make pCR2.1-attB-loxP-*y*-loxP-*frt*-1360Δ-attB. Preparing the 1360ΔTSS and 1360ΔpiRNA constructs required consecutive inverse PCR steps; primers are listed in Table S1. Donor constructs were injected by Genetic Services.

**Mobilization.** Mobilization was from the X chromosome (Line 5, X:3589639). Females homozygous for the *P* element insertion were crossed to *w*/*Y*, *Sb* Δ2-3/*TM6* males. The male progeny

carrying the *Sb* Δ2-3 chromosome and the landing pad construct were crossed to *yw*<sup>67c23</sup>; *net*; *sbd*; *spa*<sup>pol</sup> [MMR (multiply marked recessive)] females. Male progeny that carried the landing pad construct but not the *Sb* Δ2-3 chromosome were backcrossed to *yw*<sup>67c23</sup>; *net*; *sbd*; *spa*<sup>pol</sup> females, facilitating genetic mapping as indicated by the absence of one of the recessive phenotypes, *net*, *sbd*, or *spa*<sup>pol</sup>. Landing pad lines generated from the screen were maintained over appropriate second or third chromosome balancers (*CyO* or *TM3Sb*) or, for the fourth, a chromosome marked by a dominant mutation (*ci*<sup>D</sup>).

**Mapping Insertion Sites in Landing Pad Lines.** Insertion sites in landing pad lines were mapped by inverse PCR from the 5'P end to the transposon as described previously (6). The genomic position of the landing pad *P* element in line 1198 was confirmed by amplifying and sequencing the 3' end of the construct (primer 3'w v.2) and predicted flanking genomic region (primer 1198 F).

**PhiC31 Cassette Exchange.** To screen for putative recombinants, we crossed adults to *yw* and screened F1 males for *y*+. PCR was used to confirm that cassette exchange had occurred in the desired orientation, by screening for the loss of attP sites and gain of attL and attR (Fig. 1A). We crossed each recombinant to *yw* P{*y*+*mDint2*}=Crey}1b for *Cre* recombinase-mediated excision of the *yellow* marker before analysis by pigment assay; this was necessary, because enhancers present in the *yellow* gene interfered with our reporter readout.

**Eye Pigment Analysis.** Quantitative eye pigment analysis was performed on 3- to 5-d-old adults. All mutant lines analyzed were heterozygous for the reporter and for the mutant allele. Flies were homogenized in 250 μL of 0.01 M HCl in ethanol, incubated for 10 min at 50 °C, and the extract clarified by centrifugation. A final volume of 150 μL was used to measure OD at 480 nm (adapted from ref. 7).

**Assessment of RNA Products by RT-PCR.** RNA was isolated from 0- to 10-h embryos (Fig. 4B) or 3- to 5-d adult flies (Fig. 3C) using TRIzol (Invitrogen) according to the protocol of the manufacturer. For quantitative analysis of *hsp70-w* (primers *white* exon6 F/R) from <sup>+/−</sup>1360 and 1360ΔpiRNA (Fig. 3C), flies were non-heat-shocked or heat-shocked at 37 °C for 55 min and allowed to recover for 2 h before RNA extraction. RNA was DNase I-treated (Promega; RQ1 RNase-Free DNase) and reverse-transcribed (Invitrogen; SuperScript II) using random hexamer primers (Fig. 4B) or oligo dT (Fig. 3C). qPCR of the 3'P end of the *P* element (Fig. 4B) was performed using primers 1198 F and 3'P A412 R.

- Haynes KA, Caudy AA, Collins L, Elgin SC (2006) Element 1360 and RNAi components contribute to HP1-dependent silencing of a pericentric reporter. *Curr Biol* 16:2222–2227.
- Pal-Bhadra M, et al. (2004) Heterochromatic silencing and HP1 localization in *Drosophila* are dependent on the RNAi machinery. *Science* 303:669–672.
- Cox DN, et al. (1998) A novel class of evolutionarily conserved genes defined by *piwi* are essential for stem cell self-renewal. *Genes Dev* 12:3715–3727.
- Bateman JR, Lee AM, Wu CT (2006) Site-specific transformation of *Drosophila* via phiC31 integrase-mediated cassette exchange. *Genetics* 173:769–777.
- Zhu B, Cai G, Hall EO, Freeman GJ (2007) In-fusion assembly: seamless engineering of multidomain fusion proteins, modular vectors, and mutations. *Biotechniques* 43: 354–359.
- Sun F-L, et al. (2004) cis-Acting determinants of heterochromatin formation on *Drosophila melanogaster* chromosome four. *Mol Cell Biol* 24:8210–8220.
- Khesin RB, Leibovitch BA (1978) Influence of deficiency of the histone gene-containing 38B-40 region on X-chromosome template activity and the white gene position effect variegation in *Drosophila melanogaster*. *Mol Gen Genet* 162:323–328.

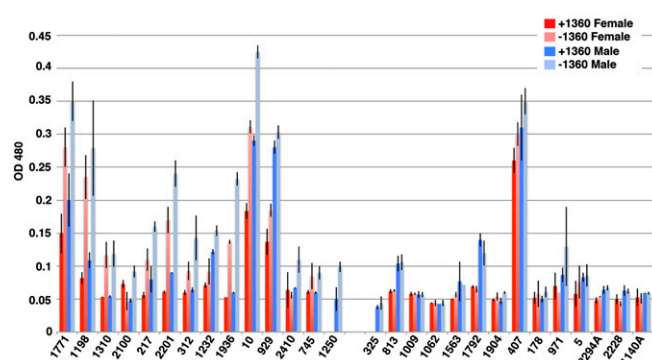

**Fig. S1.** Pigment assay (OD<sub>480</sub>; a measure of expression of the *hsp70-white* gene) for females and males carrying the reporter element (Fig. 1) at different insertion sites, with (+) or without (-) the 1360 element. The left half of the graph is a compilation of all 1360-sensitive landing pad lines, whereas the right half displays data from those that showed no change in pigment levels  $\pm$ 1360. Error bars derived from two biological replicate experiments (four technical replicates per experiment),  $\pm$ SD.

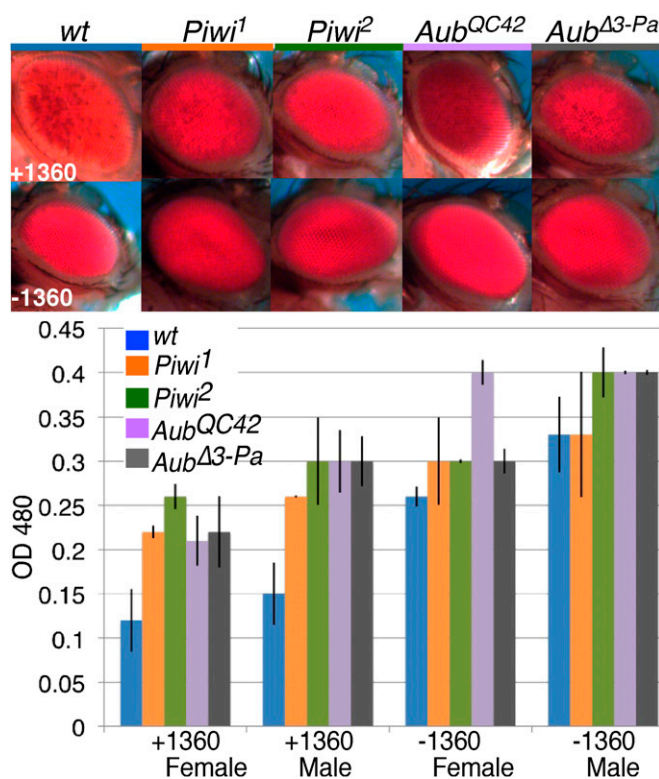

**Fig. S2.** Representative eye pictures for 1198 lines  $\pm$ 1360 (Upper) in the presence of *piwi* and *aub* mutant alleles. Pigment assay data (OD<sub>480</sub>; Lower) shows the mean of two biological replicate experiments,  $\pm$ SEM. When 1360 is present, silencing is sensitive to mutations in *piwi* and *aub*, which code for components of the RNAi system.

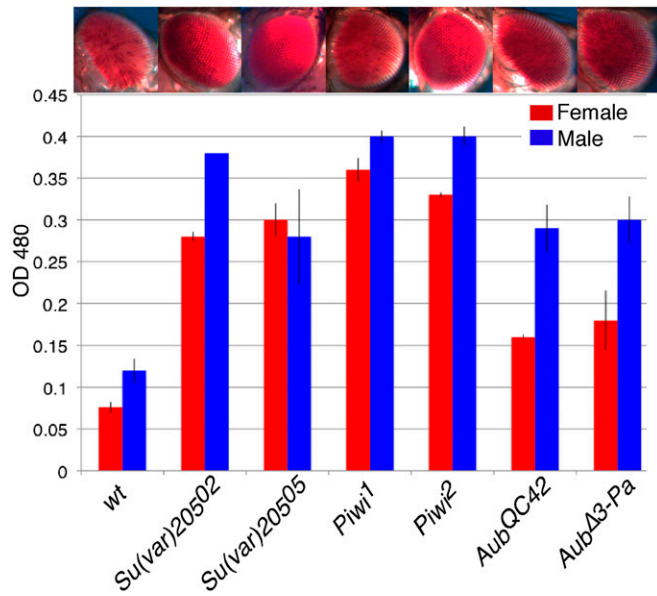

**Fig. 53.** Representative eye pictures and pigment assays (OD<sub>480</sub>) (± SEM) for line 1198 females and males carrying the reporter construct with an *Invader4* element, demonstrating the impact of mutations in *Su(var)205*, *piwi*, or *aub*. Silencing is sensitive to mutations in both the heterochromatin system and the piRNA system.

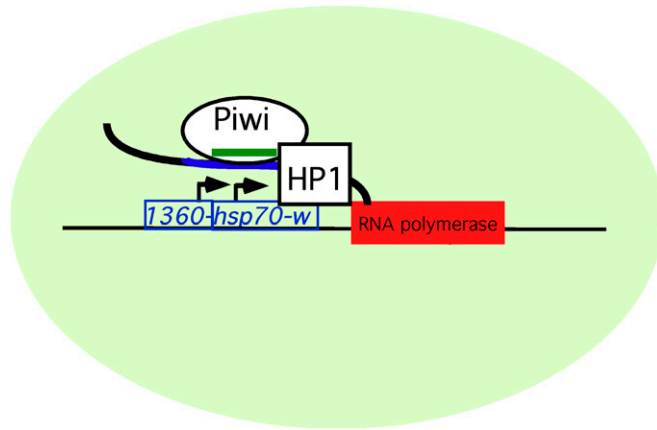

**Fig. 54.** Model for piRNA targeting of *1360*. piRNAs loaded onto Piwi could bind to the read-through transcript from the *nesd* promoter. Our results suggest that these RNA products help target HP1a to the *1360* element upstream of our reporter.

Table S1. Oligonucleotides

| Primer name              | Sequence                                    |
|--------------------------|---------------------------------------------|
| <b>Cloning</b>           |                                             |
| attP1 F                  | aggtcgacctcgaggcctttgagatgcagtacctgacggacac |
| attP1 R                  | aacgttactcgaggccttgacctgttcggagtgattagcgt   |
| attP2 F                  | tcatcaagcttatcggtcacaccacagaagtaaggttcc     |
| attP2 R                  | tcctcgacggatcgttagggaattgggaattcggtcctcg    |
| y F                      | aagccacctgattaccggaact                      |
| y R                      | tcaagcgaccaggcgatctcaaat                    |
| attB1 F                  | attacccaagcttgggtaccgactcactatagggcgaattgg  |
| attB1 R                  | gtggatccgagctcggtaaccatcaagcttatcgatccgctcg |
| attB2 F                  | agcatgcatctagagggcccgtggatccactagtcttagagc  |
| attB2 R                  | ctatagggcgaattgggcccgatgtagctcggctctcgaagc  |
| loxP F                   | tgtggacagagaaggaggcaaaaca                   |
| loxP R                   | agcgacactcccagttgttctca                     |
| XhoI8-24F                | ctggcgccgctcgacaggaaacagctatgacctatga       |
| XhoI8-24R                | tagatgcatgctcgactatagggcgaattgggcccctc      |
| 1360 $\Delta$ 1503F      | cttgccgcccgtcgagaaaggaaacgggtattaccaagacac  |
| 1360 $\Delta$ 1503R      | tagatgcatgctcgacatcgggttgatgatcaataaatttc   |
| p1360R F                 | cttgccgcccgtcgatgtaacaataacattaaaagtgtt     |
| p1360R R                 | tagatgcatgctcgacatcgggttgatgatcaataaatttc   |
| p1360L F                 | cttgccgcccgtcgagaaaggaaacgggtattaccaagacac  |
| p1360L R                 | tagatgcatgctcgatcatattaagtcaaatgatttaaat    |
| p1360-IR F               | cttgccgcccgtcgagccatacattgggttggccaaaag     |
| p1360-IR R               | tagatgcatgctcgagccatacattgggttggccactatg    |
| TSS $\Delta$ 1           | tcaaatgatttaataaataactaaataat               |
| TSS $\Delta$ 2           | attagaattaacataaataataatgtgtaaac            |
| TSS $\Delta$ 3           | ttttccggccgaaatcaattctgac                   |
| TSS $\Delta$ 4           | tagatcttcttacgctctcagcggg                   |
| TSS $\Delta$ 5           | attactctcttccgctcactcc                      |
| TSS $\Delta$ 6           | ggttaactaaagtatttttaag                      |
| piRNA I $\Delta$ F       | aacaaacttaaaaagctttaa                       |
| piRNA I $\Delta$ R       | catttatatttatgtttaaattct                    |
| piRNA II $\Delta$ F      | ccatcgatggacacgcacacttatac                  |
| piRNA II $\Delta$ R      | ccatcgatggcagatcttccgggccc                  |
| Invader4 F               | gtatgtgctgaagagtcatcaggatg                  |
| Invader4 R               | ggtagaagaagcccttaaaggatg                    |
| XhoI Invader4 F          | cttgccgcccgtcgagatctgcgac                   |
| XhoI Invader4 R          | tagatgcatgctcgacatctgggcat                  |
| Invader4 $\Delta$ LTR F  | cttgccgcccgtcgacggccttctct                  |
| Invader4 $\Delta$ LTR R  | tagatgcatgctcgatcagaagtggg                  |
| <b>Mapping</b>           |                                             |
| 5'P v.2                  | cttcggctatcgacgggaccacctta                  |
| 3'w v.2                  | gacgaaatgaaccactcggaacc                     |
| 1198 F                   | ggcattgaatgagcattgtaatcgatactt              |
| <b>Cassette exchange</b> |                                             |
| 1X1360 3'P inner F       | attaacccttagcatgtccgtggg                    |
| attB4/09 R               | atcaagcttatcgataccgctgacc                   |
| attB2F                   | gtggatccactagtcttagagc                      |
| InFusion primer bind     | tagcgaattgggaattcggtcctcg                   |
| 1X1360 3'P R             | gtatcatcagtggaaggcggaa                      |
| AttP1F                   | aagatcctctagaggtacccctcgagc                 |
| ChIP-qPCR                |                                             |
| $\alpha$ -Actinin1       | cagcaagcacctctgctcta                        |
| $\alpha$ -Actinin2       | tgcaagcgttagtgagatcc                        |
| Hsp70 F                  | caagcgcagctgaacaagctaaac                    |
| white R                  | attgatggcgtaaaccgcttgag                     |
| 18s1                     | ttcatgcttgggatgtgaa                         |
| 18s2                     | gtacaaagggcaggacgta                         |
| <b>RT-PCR</b>            |                                             |
| RpL32 F                  | cgatctcgccgagtaaac                          |
| RpL32 R                  | cttcatccgccaccagtcg                         |
| 3'P A412 v.1 R           | cccaaagctttgcgtactcgc                       |
| white exon6 Fwd          | cctcagagctgccagtttt                         |
| white exon6 Rev          | Ttttgaggggcaataaaca                         |

## Dataset S1. Landing pad insertion lines

### [Dataset S1](#)

Landing pad lines generated from our screen, giving the eye phenotype, location in the genome (chromosome, band, and sequence position of the insertion), orientation (strand), gene and repeat densities (or number of bases annotated as genes (Flybase), or repeats (repeat masker) reported as percentages measured 10 kb on either side of the insertion site for a total of a 20-kb window), with the corresponding chromatin state of the native insertion site in BG3 and S2 cells (1), *1360*-dependent silencing is indicated as "Y" (yes), "N" (no), and "U" (unknown) (not tested). Note that sites where no chromatin state information is available are marked "NA" in those columns.

1. Kharchenko PV, et al. (2011) Comprehensive analysis of the chromatin landscape in *Drosophila melanogaster*. *Nature* 471:480–485.
